# Supplementary material for: Budget constraint and the valuation of environmental impacts in Thailand
Source: Springer Nature journal article supplement (doi:10.1007/s11367-016-1210-x), 2016-10-17
Supplement: MOESM1 [file 10889894]

electronic supplementary material

Promoting sustainability in emerging economies via life cycle thinking

**Budget Constraint and the Valuation of Environmental Impacts in Thailand**

**Piyanon Kaenchan1,2 • Shabbir H. Gheewala1,2**

Received: 19 February 2016 / Accepted: 26 September 2016

© Springer-Verlag Berlin Heidelberg 2016

Responsible editor: Thapat Silalertruksa

1The Joint Graduate School of Energy and Environment, King Mongkut’s University of Technology Thonburi, Thailand

2Centre of Excellence on Energy Technology and Environment, PERDO, Bangkok, Thailand

 Shabbir H. Gheewala

[shabbir_g@jgsee.kmutt.ac.th](mailto:shabbir_g@jgsee.kmutt.ac.th)

**Table A**  Endpoint environmental effects of liquid fuels

| Production | | | | | |
| --- | --- | --- | --- | --- | --- |
| **Impact category** | **Unit** | **Light fuel oil**  **1000 L** | **Kerosene**  **1000 L** | **Molasses ethanol**  **1000 L** | **Petrol, unleaded**  **1000 L** |
| Climate change (Human Health) | QALY | 8.7E-04 | 9.6E-04 | 8.2E-04 | 1.5E-03 |
| Ozone depletion | QALY | 2.0E-06 | 2.3E-06 | 1.3E-07 | 2.5E-06 |
| Human toxicity | QALY | 5.9E-05 | 6.6E-05 | 4.9E-05 | 9.5E-05 |
| Photochemical oxidant formation | QALY | 1.5E-07 | 1.7E-07 | 8.7E-08 | 2.1E-07 |
| Particulate matter formation | QALY | 4.2E-04 | 4.6E-04 | 3.8E-04 | 6.3E-04 |
| Ionising radiation | QALY | 4.7E-06 | 5.2E-06 | 2.0E-06 | 5.8E-06 |
| Climate change (Ecosystems) | BAHY | 3.3E-02 | 3.7E-02 | 3.1E-02 | 5.6E-02 |
| Terrestrial acidification | BAHY | 2.2E-04 | 2.4E-04 | 2.3E-04 | 3.3E-04 |
| Freshwater eutrophication | BAHY | 1.6E-05 | 1.7E-05 | 4.5E-05 | 2.5E-05 |
| Terrestrial ecotoxicity | BAHY | 6.4E-05 | 7.1E-05 | 1.1E-04 | 9.3E-05 |
| Freshwater ecotoxicity | BAHY | 2.1E-05 | 2.3E-05 | 2.7E-05 | 3.1E-05 |
| Marine ecotoxicity | BAHY | 3.4E-06 | 3.7E-06 | 5.1E-06 | 5.3E-06 |
| Agricultural land occupation | BAHY | 5.9E-04 | 6.4E-04 | 1.4E-01 | 8.7E-04 |
| Urban land occupation | BAHY | 6.7E-04 | 7.4E-04 | 6.8E-04 | 8.8E-04 |
| Natural land transformation | BAHY | 1.7E-02 | 1.9E-02 | 7.5E-04 | 2.1E-02 |
| Metal depletion | USD | 1.1E+00 | 1.3E+00 | 2.1E+00 | 1.9E+00 |
| Fossil depletion | USD | 2.4E+02 | 2.7E+02 | 2.0E+01 | 3.0E+02 |
| **Use** | | | | | |
| **Impact category** | **Unit** | **Light fuel oil**  **1000 L** | **Kerosene**  **1000 L** | **Molasses ethanol**  **1000 L** | **Petrol, unleaded**  **1000 L** |
| Climate change (Human Health) | QALY | 3.8E-03 | 3.8E-03 | 2.1E-03 | 3.3E-03 |
| Climate change (Ecosystems) | BAHY | 1.5E-01 | 1.4E-01 | 8.1E-02 | 1.2E-01 |

**Notes:** Endpoint impacts of the liquid fuels production are calculated based on Ecoinvent 3.1 database (Weidema et al*.* 2014) and ReCiPe Endpoint (Hierarchist) V.1.11 (Goedkoop et al. 2014) by using SimaPro software V.8.0.4; Density of fuel oil, kerosene, ethanol, and unleaded petrol are 0.89, 0.80, 0.79, and 0.75 kg/L respectively; QALY is identical to DALY in ReCiPe; BAHY is equal to 10,000 PDF m2.yr where PDF m2.yr is the number of species loss during 1 year (species.yr) in ReCiPe divided by the number of species in a m2 [i.e. 1.48E-08 species/m2, coming from 1,604,000 global species/1.08E+14 m2 surface area (Goedkoop et al. 2013)]; Environmental impacts of the liquid fuels consumption are calculated using the factors from EPA (2014); Environmental impacts of the liquid fuels consumption cover only climate change

**Table B**  Environmental cost of liquid fuels

| Production | | | | | |
| --- | --- | --- | --- | --- | --- |
| **Impact category** | **Unit** | **Light fuel oil**  **1000 L** | **Kerosene**  **1000 L** | **Molasses ethanol**  **1000 L** | **Petrol, unleaded**  **1000 L** |
| Climate change (Human Health) | THB | 445.57 | 493.42 | 419.62 | 749.94 |
| Ozone depletion | THB | 1.04 | 1.16 | 0.07 | 1.27 |
| Human toxicity | THB | 30.35 | 33.60 | 24.87 | 48.81 |
| Photochemical oxidant formation | THB | 0.08 | 0.09 | 0.04 | 0.11 |
| Particulate matter formation | THB | 212.66 | 235.61 | 193.75 | 322.15 |
| Ionising radiation | THB | 2.40 | 2.66 | 1.00 | 2.97 |
| Climate change (Ecosystems) | THB | 293.12 | 324.60 | 275.98 | 493.36 |
| Terrestrial acidification | THB | 1.92 | 2.13 | 2.05 | 2.91 |
| Freshwater eutrophication | THB | 0.14 | 0.15 | 0.39 | 0.22 |
| Terrestrial ecotoxicity | THB | 0.56 | 0.62 | 0.95 | 0.82 |
| Freshwater ecotoxicity | THB | 0.18 | 0.20 | 0.24 | 0.27 |
| Marine ecotoxicity | THB | 0.03 | 0.03 | 0.04 | 0.05 |
| Agricultural land occupation | THB | 5.15 | 5.63 | 1259.42 | 7.68 |
| Urban land occupation | THB | 5.88 | 6.52 | 5.96 | 7.77 |
| Natural land transformation | THB | 151.39 | 168.56 | 6.59 | 184.28 |
| Metal depletion | THB | 36.19 | 40.44 | 66.34 | 62.26 |
| Fossil depletion | THB | 7638.33 | 8501.45 | 630.39 | 9524.98 |
| **Use** | | | | | |
| **Impact category** | **Unit** | **Light fuel oil**  **1000 L** | **Kerosene**  **1000 L** | **Molasses ethanol**  **1000 L** | **Petrol, unleaded**  **1000 L** |
| Climate change (Human Health) | THB | 1940.12 | 1928.86 | 1089.57 | 1668.10 |
| Climate change (Ecosystems) | THB | 1276.67 | 1269.26 | 716.98 | 1097.67 |
| Total environmental cost | THB | 12,042 | 13,015 | 4,694 | 14,176 |

**Notes:** Values in Table B are the values in Table A multiplied by 512,000 THB/QALY, 8,800 THB/QALY, and 32 THB/USD for the units of QALY, BAHY, and USD respectively

**Table C**  Percentage of environmental cost in the retail price of liquid fuels

|  | **Light fuel oil** | **Kerosene** | **Ethanol (molasses)** | **Petrol, unleaded** |
| --- | --- | --- | --- | --- |
| Retail price (of petroleum products in Bangkok in 2011) (THB/L) | 28.59 | 38.21 | 21.14 | 44.64 |
| Environmental cost per L petroleum product (THB/L) | 12.04 | 13.01 | 4.69 | 14.18 |
| Environmental cost compared to retail price (%) | 42% | 34% | 22% | 32% |
| Total cost per liter (retail price plus environmental cost) (THB/L) | 40.63 | 51.22 | 25.83 | 58.82 |

**Notes:** Retail prices of ethanol and petroleum products in Bangkok are from DEDE (2012)

**References**

DEDE (Thailand Department of Alternative Energy Development and Efficiency) (2012) Thailand Energy Statistics 2012 (Preliminary)

EPA (Environmental Protection Agency) (2014) Emission factors of greenhouse gas inventories. Accessed https://www.epa.gov/sites/production/files/2015-07/documents/emission-factors_2014.pdf

Goedkoop M, Heijungs R, Huijbregts M, De Schryver A, Struijs J, Van Zelm R (2013) ReCiPe 2008 Version 1.08. Accessed http://www.lcia-recipe.net/file-cabinet

Goedkoop M, Heijungs R, Huijbregts M, De Schryver A, Struijs J, Van Zelm R (2014) ReCiPe 2008 Version 1.11. Accessed http://www.lcia-recipe.net/file-cabinet

Weidema BP, Bauer C, Hischier R, Mutel C, Nemecek T, Reinhard J, Vadenbo CO, Wernet G (2014) The ecoinvent database: Overview and methodology, Data quality guideline for the ecoinvent database version 3.1. Accessed www.ecoinvent.org
